# Supplementary material for: Controlling the size and circular dichroism of chiral gold helicoids
Source: Royal Society of Chemistry journal article supplement (doi:10.1039/d1ma00783a), 2021-01-01
Supplement: d1ma00783a1.pdf [file d1ma00783a1.pdf]

*Electronic Supplementary Information for*

## **Controlling Size and Circular Dichroism of Chiral Gold Helicoid**

Jeong Won Kim<sup>†a</sup>, Nam Heon Cho<sup>†a</sup>, Yae-Chan Lim<sup>†a</sup>, Sang Won Im<sup>a</sup>, Jeong Hyun Han<sup>a</sup>, Ki Tae Nam<sup>\*a</sup>

<sup>a</sup> Department of Materials Science and Engineering, Seoul National University, Seoul 08826, Republic of Korea

\*E-mail: [nkitae@snu.ac.kr](mailto:nkitae@snu.ac.kr)

## CONTENT

**Supporting figure S1.** Circular dichroism and extinction spectra of 180 nm sized 432 helicoid III

**Supporting figure S2.** Graphical modelling of size-controlled 432 helicoid III

**Supporting figure S3.** Simulated circular dichroism of size-controlled 432 helicoid III

**Supporting table S1.** Detailed gap structure analysis of size-controlled 432 helicoid III

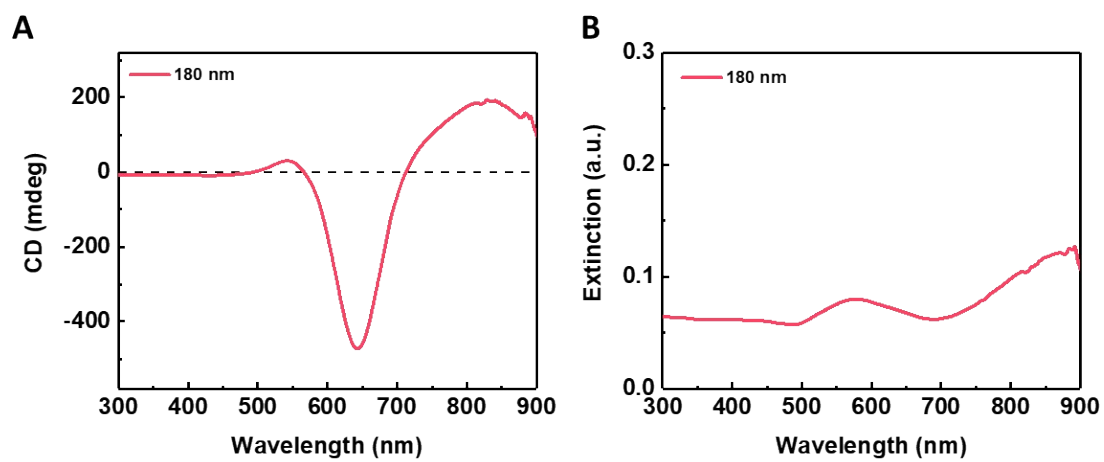

**Supporting figure S1. Circular dichroism and extinction spectra of 180 nm sized 432 helicoid III**

(A) Circular dichroism spectrum and (B) extinction spectrum of 180 nm sized 432 helicoid III nanoparticle, which are used for calculation of  $g$ -factor.

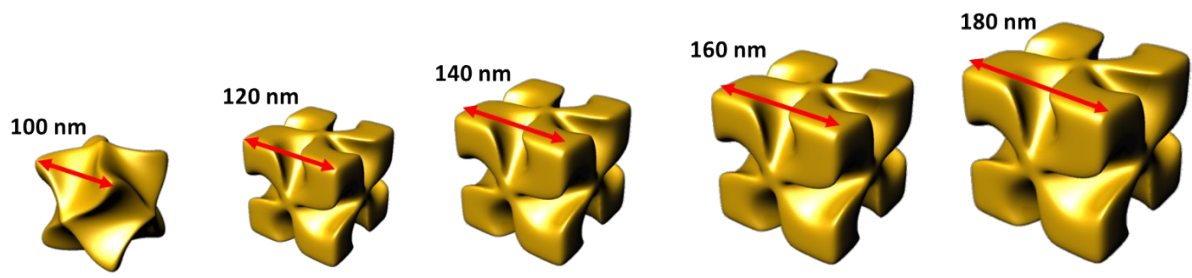

**Supporting figure S2. Graphical modelling of size-controlled 432 helicoid III**

Based on the structural analysis, various sizes of chiral nanoparticles have been modelled. For the 100 nm sized 432 helicoid III, nanoparticle with only chiral motif has been used as the model. For the 120 nm to 180 nm sized 432 helicoid III, nanoparticles have been modified only in the edge length, considering the chiral gap structures remained relatively similar to size variation of nanoparticles.

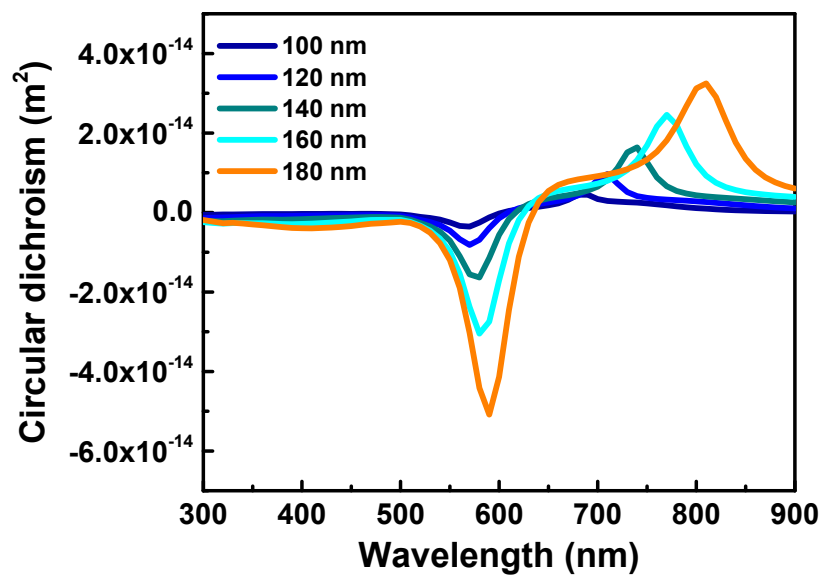

**Supporting figure S3. Simulated circular dichroism of size-controlled 432 helicoid III**

Circular dichroism of 432 helicoid III with size variation. Legends indicate the edge length of simulated 432 helicoid III nanoparticles.

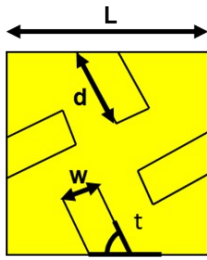

**Chiral gap geometry**

|                      | 120 nm 432 helicoid III | 180 nm 432 helicoid III |
|----------------------|-------------------------|-------------------------|
| Edge length (L) (nm) | 122.3 ( $\pm 8.8$ )     | 178.6 ( $\pm 10.5$ )    |
| Gap depth (d) (nm)   | 56.2 ( $\pm 6.1$ )      | 71.3 ( $\pm 9.0$ )      |
| Gap width (w) (nm)   | 21.5 ( $\pm 4.0$ )      | 23.8 ( $\pm 2.9$ )      |
| Gap angle (t) (deg)  | 44.0 ( $\pm 8.0$ )      | 49.7 ( $\pm 8.6$ )      |

**(Counted nanoparticles : 50)**

**Supporting table S1. Detailed gap structure analysis of size-controlled 432 helicoid III**

Statistical analysis of chiral nanoparticles and gap structures from analyzing 50 randomly selected nanoparticles. The structural analysis was conducted based on the SEM images of 120 nm and 180 nm sized 432 helicoid III nanoparticles, according to the defined geometric parameters as shown in the schematic.
